# Supplementary material
Source: PubMed Central journal article supplement (PMC3161532)
Supplement: 1111147108_pnas.201111147SI.pdf [file 1111147108_pnas.201111147SI.pdf]

# Supporting Information

Nadell and Bassler 10.1073/pnas.1111147108

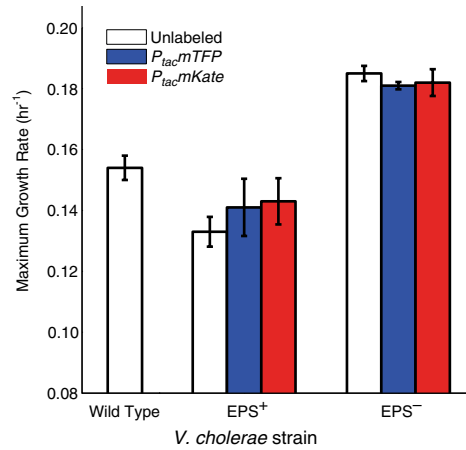

**Fig. S1.** Maximum growth rates of experimental strains and wild-type *Vibrio cholerae* at 37 °C. Maximum growth rates were measured by calculating the maximum slopes of replicate growth curves performed with shaking at 37 °C. The maximum growth rate of EPS<sup>+</sup> cells is 25% lower than that of EPS<sup>-</sup> cells. The maximum growth rates of the fluorescent strains are not significantly different from those of their parental counterparts. Error bars denote SEM ( $n = 3$ ).

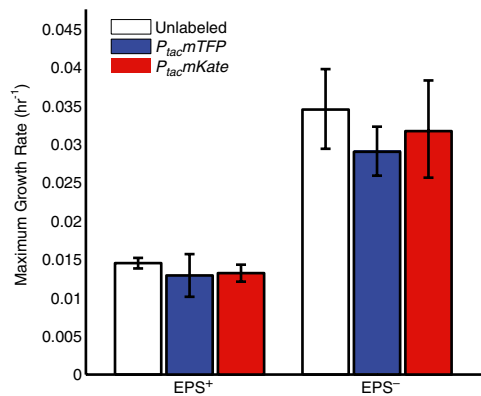

**Fig. S2.** Maximum growth rates of experimental strains and wild-type *Vibrio cholerae* at room temperature. Maximum growth rates were measured by calculating the maximum slopes of replicate growth curves performed with shaking at room temperature. The maximum growth rate of EPS<sup>+</sup> cells is 40–50% lower than that of EPS<sup>-</sup> cells. The maximum growth rates of the fluorescent strains are not significantly different from those of their parental counterparts. Error bars denote SEM ( $n = 3$ ).



**Table S1. Strains and plasmids used in this study**

| Strain/plasmid                 | Relevant features                                                   | Source/reference                                                       |
|--------------------------------|---------------------------------------------------------------------|------------------------------------------------------------------------|
| <i>Vibrio cholerae</i> strains |                                                                     |                                                                        |
| C6706str2                      | El Tor wild type                                                    | 1                                                                      |
| MM194                          | C6706str2 $\Delta hapR$                                             | 2, 3                                                                   |
| CN001                          | C6706str2 $\Delta hapR \Delta flaA$ (EPS <sup>+</sup> )             | This study                                                             |
| CN002                          | C6706str2 $\Delta hapR \Delta flaA \Delta vpsL$ (EPS <sup>-</sup> ) | This study                                                             |
| CN003                          | CN001 <i>lacZ</i> : $P_{tac}mTFP1$ : <i>lacZ</i>                    | This study                                                             |
| CN004                          | CN001 <i>lacZ</i> : $P_{tac}mKate$ : <i>lacZ</i>                    | This study                                                             |
| CN005                          | CN002 <i>lacZ</i> : $P_{tac}mTFP1$ : <i>lacZ</i>                    | This study                                                             |
| CN006                          | CN002 <i>lacZ</i> : $P_{tac}mKate$ : <i>lacZ</i>                    | This study                                                             |
| Plasmids                       |                                                                     |                                                                        |
| pKAS32                         | Suicide plasmid for allelic exchange                                | 4                                                                      |
| pBH050                         | pKAS32 $\Delta flaA$                                                | B. H. Hammer (Georgia Tech, Atlanta); this study                       |
| pCMW112                        | pKAS32 $\Delta vpsL$                                                | C. M. Waters (Michigan State University, East Lansing, MI); this study |
| pCN003                         | pKAS32 <i>lacZ</i> : $P_{tac}mTFP1$ : <i>lacZ</i>                   | This study                                                             |
| pCN004                         | pKAS32 <i>lacZ</i> : $P_{tac}mKate$ : <i>lacZ</i>                   | This study                                                             |

1. Thelin KH, Taylor RK (1996) Toxin-coregulated pilus, but not mannose-sensitive hemagglutinin, is required for colonization by *Vibrio cholerae* O1 El Tor and O139 strains. *Infect Immun* 64:2853–2856.
2. Miller MB, Skorupski K, Lenz DH, Taylor RK, Bassler BL (2002) Parallel quorum sensing circuits converge to regulate virulence in *Vibrio cholerae*. *Cell* 110:303–313.
3. Zhu J, et al. (2002) Quorum-sensing regulators control virulence gene expression in *Vibrio cholerae*. *Proc Natl Acad Sci USA* 99:3129–3134.
4. Skorupski K, Taylor RK (1996) Positive selection vectors for allelic exchange. *Gene* 169:47–52.
